# Supplementary material for: Reducing Pup Litter Size Alters Early Postnatal Calcium Homeostasis and Programs Adverse Adult Cardiovascular and Bone Health in Male Rats
Source: MDPI journal article supplement (doi:10.3390/nu11010118), 2019-01-08
Supplement: s1 [file s1]

**Table S1 – related to Table 3.** Fatty acid composition in stomach contents consumed in milk as a percentage of total of total fatty acids on postnatal day 6 (n = 6-7 per group, with n = 1 representing data from 1 pooled litter). Data are analysed with a two-way ANOVA reporting differences between Pup (Standard and Reduced litters) and Dam (Normal and Altered milk quality/composition) groups, with a Tukey's post-hoc used to identify where interactions lie. Data presented as the mean  $\pm$  SEM, where ns is not significant. Significant differences between Standard and Reduced litter pups are indicated by an asterisk (\* $P < 0.05$ ) and differences between sham operated (Control; Normal milk quality/composition) and uteroplacental insufficiency surgery (Restricted; Altered milk quality/composition) dams are indicated with a double dagger ( $\ddagger p < 0.05$ ).

| Pup<br>-on-<br>Dam              | Standard<br>-on-<br>Normal | Standard<br>-on-<br>Altered | Reduced<br>-on-<br>Normal | Reduced<br>-on-<br>Altered | Two-way ANOVA |           |             |
|---------------------------------|----------------------------|-----------------------------|---------------------------|----------------------------|---------------|-----------|-------------|
|                                 |                            |                             |                           |                            | Pup           | Dam       | Interaction |
| Saturated fatty acids (%)       |                            |                             |                           |                            |               |           |             |
| Medium chain (%)                |                            |                             |                           |                            |               |           |             |
| 8:0 Caprylic                    | 1.15±0.21                  | 1.05±0.19                   | 2.08±0.23                 | 1.44±0.26                  | p = 0.008     | ns        | ns          |
| 10:0 Capric                     | 8.61±0.48                  | 8.44±1.43                   | 9.90±0.34                 | 9.65±0.54                  | ns            | ns        | ns          |
| 12:0 Lauric                     | 10.07±0.34                 | 8.74±1.50                   | 9.16±0.32                 | 9.76±0.30                  | ns            | ns        | ns          |
| Long chain (%)                  |                            |                             |                           |                            |               |           |             |
| 14:0 Myristic                   | 12.44±0.44                 | 11.03±0.89                  | 9.01±0.65                 | 10.28±0.70                 | p = 0.008     | ns        | ns          |
| 15:0 Pentadecanoic              | 0.17±0.01                  | 0.24±0.01‡                  | 0.20±0.01*                | 0.21±0.01                  | ns            | p = 0.001 | p = 0.004   |
| 16:0 Palmitic                   | 24.34±0.76                 | 21.06±1.24                  | 18.90±0.75*               | 20.70±1.22                 | p = 0.012     | ns        | p = 0.025   |
| 17:0 Margaric                   | 0.18±0.01                  | 0.17±0.03                   | 0.17±0.01                 | 0.15±0.03                  | ns            | ns        | ns          |
| 18:0 Stearic                    | 3.14±0.24                  | 2.57±0.04‡                  | 2.57±0.07*                | 2.76±0.08                  | ns            | ns        | p = 0.007   |
| 20:0 Arachidic                  | 0.10±0.02                  | 0.09±0.02                   | 0.08±0.02                 | 0.10±0.02                  | ns            | ns        | ns          |
| Monounsaturated fatty acids (%) |                            |                             |                           |                            |               |           |             |
| 12:1 Lauroleic                  | 0.00±0.00                  | 0.28±0.11                   | 0.57±0.24                 | 0.57±0.21                  | p = 0.016     | ns        | ns          |
| 16:1 Palmitoleic                | 0.93±0.07                  | 0.97±0.08                   | 1.22±0.08                 | 1.00±0.09                  | ns            | ns        | ns          |
| 17:1 Heptadecenoic              | 0.05±0.03                  | 0.10±0.02                   | 0.08±0.02                 | 0.08±0.03                  | ns            | ns        | ns          |
| 18:1n-9 Oleic                   | 20.87±0.82                 | 20.58±1.24                  | 23.29±0.88                | 21.69±0.66                 | ns            | ns        | ns          |
| 20:1n-9 Gondoic                 | 0.51±0.03                  | 0.50±0.04                   | 0.59±0.03                 | 0.54±0.02                  | ns            | ns        | ns          |
| LC-PUFA (n-6) (%)               |                            |                             |                           |                            |               |           |             |
| 18:3n-6 γ-linolenic             | 0.20±0.01                  | 0.25±0.01‡                  | 0.26±0.01*                | 0.23±0.02                  | ns            | ns        | p = 0.006   |
| 20:2 Eciosatrienoic             | 0.53±0.02                  | 0.58±0.03                   | 0.63±0.03                 | 0.60±0.03                  | p = 0.051     | ns        | ns          |
| 20:3n-6 Dihomo-γ-linolenic      | 0.35±0.02                  | 0.40±0.02                   | 0.40±0.01                 | 0.39±0.01                  | ns            | ns        | ns          |
| 22:4n-6 Docosatetraenoic        | 0.49±0.04                  | 0.69±0.10                   | 0.82±0.07*                | 0.70±0.06                  | p = 0.029     | ns        | p = 0.046   |
| LC-PUFA (n-3) (%)               |                            |                             |                           |                            |               |           |             |
| 22:5n-3 Docosapentaenoic        | 0.36±0.03                  | 0.38±0.04                   | 0.50±0.04                 | 0.43±0.03                  | p = 0.016     | ns        | ns          |
